# Supplementary material
Source: ML conference proceedings conference paper supplement (https://proceedings.mlr.press/v70/zheng17b.html)
Supplement: Supplementary file [file zheng17b-supp.pdf]

---

## Supplementary Material: Asynchronous Stochastic Gradient Descent with Delay Compensation

---

### A. Theorem 3.1 and Its Proof

#### Theorem 3.1:

Assume the loss function is  $L_1$ -Lipschitz. If  $\lambda \in [0, 1]$  make the following inequality holds,

$$\sum_{k=1}^K \frac{1}{\sigma_k^3(x, \mathbf{w}_t)} \geq 2 \left[ C_{ij} \left( \sum_{k=1}^K \frac{1}{\sigma_k(x, \mathbf{w}_t)} \right)^2 + C'_{ij} L_1^2 |\epsilon_t| \right], \quad (1)$$

where  $C_{ij} = \frac{1}{1+\lambda} \left( \frac{u_i u_j \beta}{l_i l_j \sqrt{\alpha}} \right)^2$ ,  $C'_{ij} = \frac{1}{(1+\lambda)\alpha(l_i l_j)^2}$ , and the model converges to the optimal model, then the MSE of  $\lambda G(\mathbf{w}_t)$  is smaller than the MSE of  $G(\mathbf{w}_t)$  in approximating Hessian  $H(\mathbf{w}_t)$ .

#### Proof:

For simplicity, we abbreviate  $\mathbb{E}_{(Y|x, w^*)}$  as  $\mathbb{E}$ ,  $G_t$  as  $G(\mathbf{w}_t)$  and  $H_t$  as  $H(\mathbf{w}_t)$ . First, we calculate the MSE of  $G_t$ ,  $\lambda G_t$  to approximate  $H_t$  for each element of  $G_t$ . We denote the element in the  $i$ -th row and  $j$ -th column of  $G(\mathbf{w}_t)$  as  $G_{ij}^t$  and  $H(\mathbf{w}_t)$  as  $H_{ij}(t)$ .

The MSE of  $G_{ij}^t$ :

$$\mathbb{E}(G_{ij}^t - \mathbb{E}H_{ij}^t)^2 = \mathbb{E}(G_{ij}^t - \mathbb{E}G_{ij}^t)^2 + (\mathbb{E}H_{ij}^t - \mathbb{E}G_{ij}^t)^2 = \mathbb{E}(G_{ij}^t)^2 - (\mathbb{E}G_{ij}^t)^2 + \epsilon_t^2 \quad (2)$$

The MSE of  $\lambda g_{ij}$ :

$$\begin{aligned} \mathbb{E}(\lambda G_{ij}^t - \mathbb{E}H_{ij}^t)^2 &= \lambda^2 \mathbb{E}(G_{ij}^t - \mathbb{E}G_{ij}^t)^2 + (\mathbb{E}H_{ij}^t - \lambda \mathbb{E}G_{ij}^t)^2 \\ &= \lambda^2 \mathbb{E}(G_{ij}^t)^2 - \lambda^2 (\mathbb{E}G_{ij}^t)^2 + (1 - \lambda)^2 (\mathbb{E}G_{ij}^t)^2 + \epsilon_t^2 + 2(\lambda - 1) \mathbb{E}G_{ij}^t \epsilon_t \end{aligned} \quad (3)$$

The condition for  $\mathbb{E}(G_{ij}^t - \mathbb{E}H_{ij}^t)^2 \geq \mathbb{E}(\lambda G_{ij}^t - \mathbb{E}H_{ij}^t)^2$  is

$$(1 - \lambda^2)(\mathbb{E}(G_{ij}^t)^2 - (\mathbb{E}G_{ij}^t)^2) \geq 2(1 - \lambda)(\mathbb{E}G_{ij}^t)^2 + 2(\lambda - 1)\mathbb{E}G_{ij}^t \epsilon_t \quad (4)$$

Inequality (4) is equivalent to

$$(1 + \lambda)\mathbb{E}(G_{ij}^t)^2 \geq 2[(\mathbb{E}G_{ij}^t)^2 - \mathbb{E}G_{ij}^t \epsilon_t] \quad (5)$$

Next we calculate  $\mathbb{E}(G_{ij}^t)^2$ , and  $(\mathbb{E}G_{ij}^t)^2$  which appear in Eqn.(5). For simplicity, we denote  $\sigma_k(x, \mathbf{w}_t)$  as  $\sigma_k$ , and  $I_{[Y=k]}$

as  $z_k$ . Then we can get:

$$\mathbb{E}(g_{ij})^2 = \mathbb{E}_{(Y|x, \mathbf{w}_t)} \left( \frac{\partial}{\partial w_i} \log P(Y|x, \mathbf{w}_t) \right)^2 \left( \frac{\partial}{\partial w_j} \log P(Y|x, \mathbf{w}_t) \right)^2 \quad (6)$$

$$\begin{aligned} &\geq \mathbb{E}_{(Y|x, \mathbf{w}^*)} \left( \sum_{k=1}^K \left( -\frac{z_k}{\sigma_k} \right) \right)^4 (l_i l_j)^2 \\ &= \alpha (l_i l_j)^2 \left( \sum_{k=1}^K \frac{1}{\sigma_k^2(x, \mathbf{w}_t)} \right) \end{aligned} \quad (7)$$

$$\begin{aligned} (\mathbb{E}h_{ij})^2 &= \left( \mathbb{E}_{(Y|x, \mathbf{w}^*)} \sum_{k=1}^K \frac{\partial \sigma_k}{\partial w_i} \left( -\frac{z_k}{\sigma_k} \right) \cdot \sum_{k=1}^K \frac{\partial \sigma_k}{\partial w_j} \left( -\frac{z_k}{\sigma_k} \right) \right)^2 \\ &\leq \beta^2 (u_i u_j)^2 \left( \sum_{k=1}^K \frac{1}{\sigma_k(x, \mathbf{w}_t)} \right)^2. \end{aligned} \quad (8)$$

By substituting Ineq.(7) and Ineq.(8) into Ineq.(5), a sufficient condition for Ineq.(5) to be satisfied is  $\sum_{k=1}^K \frac{1}{\sigma_k^3(x, \mathbf{w}_t)} \geq 2 \left[ C'_{ij} \left( \sum_{k=1}^K \frac{1}{\sigma_k(x, \mathbf{w}_t)} \right)^2 + C'_{ij} L_1^2 |\epsilon_t| \right]$  because  $G_{ij}^t \leq L_1^2$ .  $\square$

## B. Corollary 3.2 and Its Proof

**Corollary 3.2:** A sufficient condition for inequality (1) is  $\lambda \in [0, 1]$  and  $\exists k_0 \in [K]$  such that  $\sigma_{k_0} \in \left[ 1 - \frac{K-1}{2(C_{ij}K^2 + C'_{ij}L_1^2|\epsilon_t)}, 1 \right]$ .

**Proof:**

Denote  $\Delta = \frac{K-1}{2C_{ij}K^2}$  and  $F(\sigma_1, \dots, \sigma_K) = \sum_{k=1}^K \frac{1}{\sigma_k^3(x, \mathbf{w}_t)} - 2C_{ij} \left( \sum_{k=1}^K \frac{1}{\sigma_k(x, \mathbf{w}_t)} \right)^2 - 2C'_{ij}L_1^2|\epsilon_t|$ . If  $\exists k_1 \in [K]$  such that  $\sigma_{k_1} \in [1 - \Delta, 1]$ , we have for  $k \neq k_1$   $\sigma_k \in [0, \Delta]$ . Therefore

$$F(\sigma_1, \dots, \sigma_K) \geq \frac{1}{(\sigma_{k_1})^3} + \frac{K-1}{\Delta^3} - 2C_{ij} \left( \frac{1}{\sigma_{k_1}} + \frac{K-1}{\Delta} \right)^2 - 2C'_{ij}L_1^2|\epsilon_t| \quad (9)$$

$$\geq \frac{K-1}{\Delta^3} - 2C_{ij} \left( \left( \frac{K-1}{\Delta} \right)^2 + \frac{1}{\sigma_{k_1}^2} + \frac{2(K-1)}{\sigma_{k_1}\Delta} \right) - 2C'_{ij}L_1^2|\epsilon_t| \quad (10)$$

$$\geq \frac{K-1}{\Delta^3} - 2C_{ij} \left( \frac{(K-1)^2}{\Delta^2} + \frac{2K-1}{\sigma_{k_1}\Delta} \right) - 2C'_{ij}L_1^2|\epsilon_t| \quad (11)$$

$$= \frac{1}{\Delta} \left( \frac{K-1}{\Delta^2} - 2C_{ij} \left( \frac{(K-1)^2}{\Delta} + \frac{2K-1}{\sigma_{k_1}} \right) \right) - 2C'_{ij}L_1^2|\epsilon_t| \quad (12)$$

$$\geq \frac{1}{\Delta} \left( \frac{K-1}{\Delta^2} - 2C_{ij} \left( \frac{(K-1)^2 + 2K-1}{\Delta} \right) \right) - 2C'_{ij}L_1^2|\epsilon_t| \quad (13)$$

$$\geq \frac{1}{\Delta^2} \left( \frac{K-1}{\Delta} - 2C_{ij}K^2 - 2C'_{ij}L_1^2|\epsilon_t| \right) \quad (14)$$

$$= 0 \quad (15)$$

where Ineq.(11) and (13) is established since  $\sigma_{k_1} > \Delta$ ; and Eqn.(15) is established by putting  $\Delta = \frac{K-1}{2(C_{ij}K^2 + C'_{ij}L_1^2|\epsilon_t|)}$  in Eqn.(14).  $\square$

### C. Uniform upper bound of MSE

**Lemma C.1** Assume the loss function is  $L_1$ -Lipschitz, and the diagonalization error of Hessian is upper bounded by  $\epsilon_D$ , i.e.,  $\|Diag(H(\mathbf{w}_t)) - H(\mathbf{w}_t)\| \leq \epsilon_D$ ,<sup>1</sup> then we have, for  $\forall t$ ,

$$mse^t(Diag(\lambda G)) \leq 4\lambda^2 V_1 + 4(1-\lambda)^2 L_1^4 + 4\epsilon_t^2 + 4\epsilon_D, \quad (16)$$

where  $V_1$  is the upper bound of the variance of  $G(\mathbf{w}_t)$ .

**Proof:**

$$mse^t(Diag(\lambda G)) \quad (17)$$

$$\leq \mathbb{E}\|Diag(\lambda G(w_t)) - H(w_t)\|^2 \quad (18)$$

$$\leq 4\mathbb{E}\|Diag(\lambda G(w_t)) - \mathbb{E}(Diag(\lambda G(w_t)))\|^2 + 4\|\mathbb{E}(Diag(\lambda G(w_t))) - \mathbb{E}(Diag(G(w_t)))\|^2 \quad (19)$$

$$+ 4\|\mathbb{E}(Diag(G(w_t))) - \mathbb{E}(Diag(H(w_t)))\|^2 + 4\|\mathbb{E}(Diag(H(w_t))) - \mathbb{E}H(w_t)\|^2 \quad (20)$$

$$\leq 4\lambda^2 V_1 + 4(1-\lambda)^2 L_1^4 + 4\epsilon_t^2 + 4\epsilon_D \quad (21)$$

### D. Convergence Rate for DC-ASGD: Convex Case

DC-ASGD is a general method to compensate delay in ASGD. We first show the convergence rate for convex loss function. If the loss function  $f(w)$  is convex about  $w$ , we can add a regularization term  $\frac{\rho}{2}\|w\|^2$  to make the objective function  $F(w) + \frac{\rho}{2}\|w\|^2$  strongly convex. Thus, we assume that the objective function is  $\mu$ -strongly convex.

**Theorem 4.1: (Strongly Convex)** If  $f(w)$  is  $L_2$ -smooth and  $\mu$ -strongly convex about  $w$ ,  $\nabla f(w)$  is  $L_3$ -smooth about  $w$  and the expectation of the  $\|\cdot\|_2^2$  norm of the delay compensated gradient is upper bounded by a constant  $G$ . By setting the learning rate  $\eta_t = \frac{1}{\mu t}$ , DC-ASGD has convergence rate as

$$\mathbb{E}F(w_t) - F(w^*) \leq \frac{2L_2^2 G^2}{t\mu^4} (1 + 4\tau C_\lambda) + \frac{2G^2 L_2^2 \theta \sqrt{\tau}}{\mu^4 t \sqrt{t}} + \frac{L^3 L_2^3 \tau^2 G^3}{\mu^6 t^2},$$

where  $\theta = \frac{2HKLG}{\mu} \sqrt{\frac{L_2}{\mu} (1 + \frac{\tau G L_3}{\mu L_2})}$  and  $C_\lambda = (1-\lambda)L_1^2 + \epsilon_D$ , and the expectation is taking with respect to the random sampling of DC-ASGD and  $\mathbb{E}_{(y|x, w^*)}$ .

**Proof:**

We denote  $g^{dc}(w_t) = g(w_t) + \lambda g(w_t) \odot g(w_t) \odot (w_{t+\tau} - w_t)$ ,  $g^h(w_t) = g(w_t) + H_{i_t}(w_t)(w_{t+\tau} - w_t)$  and  $\nabla F^h(w_t) = \nabla F(w_t) + \mathbb{E}_{i_t} H_{i_t}(w_t)(w_{t+\tau} - w_t)$ . Obviously, we have  $\mathbb{E}g^h(w_t) = \nabla F^h(w_t)$ . By the smoothness condition, we have

$$\mathbb{E}F(w_{t+\tau+1}) - F(w^*) \quad (22)$$

$$\leq F(w_{t+\tau}) - F(w^*) - \langle \nabla F(w_{t+\tau}), w_{t+\tau+1} - w_{t+\tau} \rangle + \frac{L_2}{2} \|w_{t+\tau+1} - w_{t+\tau}\|^2 \quad (23)$$

$$\leq F(w_{t+\tau}) - F(w^*) - \eta_{t+\tau} \langle \nabla F(w_{t+\tau}), g^{dc}(w_t) \rangle + \frac{L_2 \eta_{t+\tau}^2 G^2}{2} \quad (24)$$

$$= F(w_{t+\tau}) - F(w^*) - \eta_{t+\tau} \langle \nabla F(w_{t+\tau}), \nabla F(w_{t+\tau}) \rangle + \eta_{t+\tau} \langle \nabla F(w_{t+\tau}), \nabla F(w_{t+\tau}) - \nabla F^h(w_t) \rangle \quad (25)$$

$$+ \eta_{t+\tau} \langle \nabla F(w_{t+\tau}), \mathbb{E}g^h(w_t) - g^{dc}(w_t) \rangle + \frac{L_2 \eta_{t+\tau}^2 G^2}{2} \quad (26)$$

Since  $f(w)$  is  $L_2$ -smooth and  $\mu$  strongly convex, we have

$$-\langle \nabla F(w_{t+\tau}), \nabla F(w_{t+\tau}) \rangle \leq -\mu^2 \|w_{t+\tau} - w^*\|^2 \leq -\frac{2\mu^2}{L_2} (F(w_{t+\tau}) - F(w^*)). \quad (27)$$

<sup>1</sup>(LeCun, 1987) demonstrated that the diagonal approximation to Hessian for neural networks is an efficient method with no much drop on accuracy

For the term  $\eta_{t+\tau} \langle \nabla F(w_{t+\tau}), \nabla F(w_{t+\tau}) - \nabla F^h(w_t) \rangle$ , we have

$$\eta_{t+\tau} \langle \nabla F(w_{t+\tau}), \nabla F(w_{t+\tau}) - \nabla F^h(w_t) \rangle \quad (28)$$

$$\leq \eta_{t+\tau} \|\nabla F(w_{t+\tau})\| \|\nabla F(w_{t+\tau}) - \nabla F^h(w_t)\| \quad (29)$$

$$\leq \eta_{t+\tau} G \|\nabla F(w_{t+\tau}) - \nabla F^h(w_t)\| \quad (30)$$

By the smoothness condition for  $\nabla F(w)$ , we have

$$\|\nabla F(w_{t+\tau}) - \nabla F^h(w_t)\| \leq \frac{L_3}{2} \|w_{t+\tau} - w_t\|^2 \leq \frac{L_3 \tau G^2}{2} \sum_{j=0}^{\tau-1} \eta_{t+j}^2 \quad (31)$$

Let  $\eta_t = \frac{L_2}{\mu^2 t}$ , we can get  $\sum_{j=1}^{\tau} \eta_{t+j}^2 \leq \frac{L_2^2}{\mu^4} \cdot \frac{\tau}{t(t+\tau)} \leq \frac{2L_2^2 \tau}{\mu^4 (t+\tau)^2}$ .

For the term  $\eta_{t+\tau} \langle \nabla F(w_{t+\tau}), \mathbb{E}g^h(w_t) - g^{dc}(w_t) \rangle$ , we have

$$\langle \nabla F(w_{t+\tau}), \mathbb{E}(g^h(w_t) - g^{dc}(w_t)) \rangle \quad (32)$$

$$\leq \|\nabla F(w_{t+\tau})\| \|\mathbb{E}(\lambda g(w_t) \odot g(w_t) - H(w_t))(w_{t+\tau} - w_t)\| \quad (33)$$

$$\leq G^2 \tau \sum_{j=0}^{\tau-1} \eta_{t+j} (\|\mathbb{E}(\lambda g(w_t) \odot g(w_t) - g(w_t) \odot g(w_t))\| + \|g(w_t) \odot g(w_t) - \text{Diag}(H(w_t))\| + \|\text{Diag}(H(w_t)) - H(w_t)\|) \quad (34)$$

$$\leq \frac{2G^2 L_2 \tau}{(t+\tau) \mu^2} (C_\lambda + \epsilon_t), \quad (35)$$

where  $C_\lambda = (1-\lambda)L_1^2 + \epsilon_D$ .

Using Lemma F.1,  $\epsilon_t \leq \theta \sqrt{\frac{1}{t}} \leq \theta \sqrt{\frac{\tau}{t+\tau}}$ . Putting inequality 27 and 31 in inequality 26, we have

$$\mathbb{E}F(w_{t+\tau+1}) - F(w^*) \leq \left(1 - \frac{2}{t+\tau}\right) (\mathbb{E}F(w_t) - F(w^*)) + \frac{L_3 L_2^3 \tau^2 G^3}{\mu^6 (t+\tau)^3} \quad (36)$$

$$+ \frac{2G^2 L_2^2 \tau}{\mu^4 (t+\tau)^2} \left(C_\lambda + \theta \sqrt{\frac{\tau}{t+\tau}}\right) + \frac{L_2^2 G^2}{2(t+\tau)^2 \mu^4} \quad (37)$$

We can get

$$\mathbb{E}F(w_t) - F(w^*) \leq \frac{2L_2^2 G^2}{t\mu^4} (1 + 4\tau C_\lambda) + \frac{2G^2 L_2^2 \theta \sqrt{\tau}}{\mu^4 t \sqrt{t}} + \frac{L^3 L_2^3 \tau^2 G^3}{\mu^6 t^2} \quad (38)$$

by induction.  $\square$

### Discussion:

(1). Following the above proof steps and using  $\|\nabla F(w_{t+\tau}) - \nabla F(w_t)\| \leq L_2 \|w_{t+\tau} - w_t\|$ , we can get the convergence rate of ASGD is

$$\mathbb{E}F(w_t) - F(w^*) \leq \frac{2L_2^2 G^2}{t\mu^4} (1 + 4\tau L_2). \quad (39)$$

Compared the convergence rate of DC-ASGD with ASGD, the extra term  $\frac{2G^2 L_2^2 \theta \sqrt{\tau}}{\mu^4 t \sqrt{t}} + \frac{L^3 L_2^3 \tau^2 G^3}{\mu^6 t^2}$  converge to zero faster than  $\frac{2L_2^2 G^2}{t\mu^4} (1 + 4\tau C_\lambda)$  in terms of the order of  $t$ . Thus, when  $t$  is large, the extra term has smaller value. We assume that  $t$  is large and the term can be neglected. Then the condition for DC-ASGD outperforming ASGD is  $L_2 > C_\lambda$ .

## E. Convergence Rate for DC-ASGD: Nonconvex Case

**Theorem 5.1: (Nonconvex Case)** Assume that Assumptions 1-4 hold. Set the learning rate

$$\eta_t = \sqrt{\frac{2(F(w_1) - F(w^*))}{bTV^2 L_2}}, \quad (40)$$

where  $b$  is the mini-batch size, and  $V$  is the upper bound of the variance of the delay-compensated gradient. If  $T \geq \max\{\mathcal{O}(1/r^4), 2D_0bL_2/V^2\}$  and delay  $\tau$  is upper-bounded as below,

$$\tau \leq \min \left\{ \frac{L_2V}{C_\lambda} \sqrt{\frac{L_2T}{2D_0b}}, \frac{V}{C_\lambda} \sqrt{\frac{L_2T}{2D_0b}}, \frac{TV}{\tilde{C}} \sqrt{\frac{L_2}{bD_0}}, \frac{VL_2T}{4\tilde{C}} \sqrt{\frac{TL_2}{2D_0b}} \right\}. \quad (41)$$

then DC-ASGD has the following ergodic convergence rate,

$$\min_{t=\{1, \dots, T\}} \mathbb{E}(\|\nabla F(\mathbf{w}_t)\|^2) \leq V \sqrt{\frac{2D_0L_2}{bT}}, \quad (42)$$

where the expectation is taken with respect to the random sampling in SGD and the data distribution  $P(Y|x, \mathbf{w}^*)$ .

**Proof:**

We denote  $g_m(w_t) + \lambda g_m(w_t) \odot g_m(w_t) \odot (w_{t+\tau} - w_t)$  as  $g_m^{dc}(w_t)$  where  $m \in \{1, \dots, b\}$  is the index of instances in the minibatch. From the proof the Theorem 1 in ASGD (Lian et al., 2015), we can get

$$\mathbb{E}F(w_{t+\tau+1}) - F(w_{t+\tau}) \quad (43)$$

$$\leq \langle \nabla F(w_{t+\tau}), w_{t+\tau} - w_t \rangle + \frac{L_2}{2} \|w_{t+\tau+1} - w_{t+\tau}\|^2 \quad (44)$$

$$\leq -\eta_{t+\tau} \langle \nabla F(w_{t+\tau}), \sum_{m=1}^b \mathbb{E}g_m^{dc}(w_t) \rangle + \frac{\eta_{t+\tau}^2 L_2}{2} \mathbb{E} \left( \left\| \sum_{m=1}^b g_m^{dc}(w_t) \right\|^2 \right) \quad (45)$$

$$\begin{aligned} &\leq -\frac{b\eta_{t+\tau}}{2} \left( \|\nabla F(w_{t+\tau})\|^2 + \left\| \sum_{m=1}^b \mathbb{E}g_m^{dc}(w_t) \right\|^2 - \left\| \nabla F(w_{t+\tau}) - \sum_{m=1}^b \mathbb{E}g_m^{dc}(w_t) \right\|^2 \right) \\ &\quad + \frac{\eta_{t+\tau}^2 L_2}{2} \mathbb{E} \left( \left\| \sum_{m=1}^b g_m^{dc}(w_t) \right\|^2 \right) \end{aligned} \quad (46)$$

For the term  $T_1 = \left\| \nabla F(w_{t+\tau}) - \sum_{m=1}^b \mathbb{E}g_m^{dc}(w_t) \right\|^2$ , by using the smooth condition of  $g$ , we have

$$T_1 = \left\| \nabla F(w_{t+\tau}) - \sum_{m=1}^b \mathbb{E}g_m^{dc}(w_t) \right\|^2 \quad (47)$$

$$\leq \left\| \nabla F(w_{t+\tau}) - \nabla F^h(w_t) + \nabla F^h(w_t) - \sum_{m=1}^b \mathbb{E}g_m^{dc}(w_t) \right\|^2 \quad (48)$$

$$\leq 2 \left\| \frac{L_3}{2} \|w_{t+\tau} - w_t\|^2 \right\|^2 + 2 \left\| \nabla F^h(w_t) - \sum_{m=1}^b \mathbb{E}g_m^{dc}(w_t) \right\|^2 \quad (49)$$

$$\leq (L_3^2 \pi^2 / 2 + 2((1-\lambda)L_1^2 + \epsilon_D)^2 + \epsilon_t^2) \|w_{t+\tau} - w_t\|^2 \quad (50)$$

Thus by following the proof of ASGD, we have

$$\mathbb{E}(T_1) \leq 4(L_3^2 \pi^2 / 4 + ((1-\lambda)L_1^2 + \epsilon_D)^2 + \epsilon_t^2) \left( b\tau \eta_{t+\tau}^2 V^2 + \tau^2 \eta_{t+\tau}^2 \left\| b \mathbb{E}g_m^{dc}(w_t) \right\|^2 \right). \quad (51)$$

For the term  $T_2 = \mathbb{E} \left( \left\| \sum_{m=1}^b g_m^{dc}(w_t) \right\|^2 \right)$ , it has

$$\mathbb{E}(T_2) \leq bV^2 + \left\| b \mathbb{E}g_m^{dc}(w_t) \right\|^2. \quad (52)$$

By putting Ineq.(51) and Ineq.(52) in Ineq.(46), we can get

$$\begin{aligned} & \mathbb{E}(F(w_{t+\tau+1}) - F(w_{t+\tau})) \\ & \leq -\frac{b\eta_{t+\tau}}{2} \mathbb{E}\|\nabla F(w_{t+\tau})\|^2 + \left(\frac{\eta_{t+\tau}^2 L_2}{2} - \frac{\eta_{t+\tau}}{2b}\right) \mathbb{E}\left(\|b\mathbb{E}g_m^{dc}(w_t)\|^2\right) \end{aligned} \quad (53)$$

$$+ \left(\frac{\eta_{t+\tau}^2 bL_2}{2} + (L_3^2\pi^2/2 + 2((1-\lambda)L_1^2 + \epsilon_D)^2 + \epsilon_t^2)b^2\tau\eta_{t+\tau}^3\right) V^2 \quad (54)$$

$$+ (L_3^2\pi^2/2 + 2((1-\lambda)L_1^2 + \epsilon_D)^2 + \epsilon_t^2)b\tau^2\eta_{t+\tau}^3\mathbb{E}\left(\|b\mathbb{E}g_m^{dc}(w_t)\|^2\right) \quad (55)$$

Summarizing the Ineq.(55) from  $t = 1$  to  $t + \tau = T$ , we have

$$\mathbb{E}F(w_{T+1}) - F(w_1) \quad (56)$$

$$\leq -\frac{b}{2} \sum_{t=1}^T \eta_t \mathbb{E}\|\nabla F(w_t)\|^2 + \sum_{t=1}^T \left(\frac{\eta_{t+\tau}^2 bL_2}{2} + (L_3^2\pi^2/2 + 2((1-\lambda)L_1^2 + \epsilon_D)^2 + \epsilon_t^2)b^2\tau\eta_{t+\tau}^3\right) V^2 \quad (57)$$

$$+ \sum_{t=1}^T \left(\frac{\eta_t^2 L_2}{2} + (L_3^2\pi^2/2 + 2((1-\lambda)L_1^2 + \epsilon_D)^2 + \epsilon_t^2)b\tau^2\eta_t^3 - \frac{\eta_t}{2b}\right) \mathbb{E}\|b\mathbb{E}g_m^{dc}(w_{\max\{t-\tau, 1\}})\|^2. \quad (58)$$

By Lemma F.1 and under our assumptions, we have when  $t > T_0$ ,  $w_t$  will goes into a strongly convex neighbourhood of some local optimal  $w_{loc}$ . Thus,  $\epsilon_t \leq \epsilon_{nc} + \theta\sqrt{1/(t - T_0)}$ , when  $t > T_0$  and  $\epsilon_t < \max_{s \in 1, \dots, T_0} \epsilon_s$  when  $t < T_0$ .

Let  $\eta_t = \sqrt{\frac{2(F(w_1) - F(w^*))}{bTV^2L_2}}$ . It follows that

$$\sum_{t=1}^T \frac{\eta_t L_2}{2} + (L_3^2\pi^2/2 + 2((1-\lambda)L_1^2 + \epsilon_D)^2 + \epsilon_t^2)b\tau^2\eta_t^2 \quad (59)$$

$$\leq \sum_{t=1}^T \left\{ \frac{\eta_t L_2}{2} + (L_3^2\pi^2/2 + 2((1-\lambda)L_1^2 + \epsilon_D)^2 + 2\epsilon_{nc}^2)b\tau^2\eta_t^2 \right\} + 2b\tau^2\eta_t^2(4T_0 \max_{s \in 1, \dots, T_0} (\epsilon_s)^2 + 4\theta^2 \log(T - T_0)) \quad (60)$$

We ignore the  $\log(T - T_0)$  term and regards  $\tilde{C}^2 = 4T_0 \max_{s \in 1, \dots, T_0} (\epsilon_s)^2 + 4\theta^2 \log(T - T_0)$  as a constant, which yields

$$\sum_{t=1}^T \frac{\eta_t L_2}{2} + (L_3^2\pi^2/2 + 2((1-\lambda)L_1^2 + \epsilon_D)^2 + \epsilon_t^2)b\tau^2\eta_t^2 \quad (61)$$

$$\leq \sum_{t=1}^T \left\{ \frac{\eta_t L_2}{2} + (L_3^2\pi^2/2 + 2((1-\lambda)L_1^2 + \epsilon_D)^2 + 2\epsilon_{nc}^2)b\tau^2\eta_t^2 \right\} + 2\tau^2\eta_t^2 b\tilde{C}^2 \quad (62)$$

$\eta_t$  should be set to make

$$\sum_{t=1}^T \left( \frac{\eta_t^2 L_2}{2} + (L_3^2\pi^2/2 + 2((1-\lambda)L_1^2 + \epsilon_D)^2 + 2\epsilon_{nc}^2)b\tau^2\eta_t^3 + \frac{2\tau^2\eta_t^3 b\tilde{C}^2}{T} - \frac{\eta_t}{2b} \right) \leq 0. \quad (63)$$

Then we can get

$$\frac{1}{T} \sum_{t=1}^T \mathbb{E}\|\nabla F(w_t)\|^2 \quad (64)$$

$$\leq \frac{2(F(w_1) - F(w^*)) + Tb(\eta_t^2 L_2 + 2(L_3^2\pi^2/2 + 2((1-\lambda)L_1^2 + \epsilon_D)^2 + 2\epsilon_{nc}^2)b\tau\eta_t^3)V^2 + \frac{\eta_t^3 \tilde{C}^2 4b\tau}{T} V^2}{bT\eta_t} \quad (65)$$

$$\leq \frac{2(F(w_1) - F(w^*))}{bT\eta_t} + (\eta_t L_2 + 2(L_3^2\pi^2/2 + 2((1-\lambda)L_1^2 + \epsilon_D)^2 + 2\epsilon_{nc}^2)b\tau\eta_t^2)V^2 + \frac{\eta_t^2 \tilde{C}^2 4b\tau V^2}{T} \quad (66)$$

$$(67)$$

We set  $\eta_t$  to make

$$(2(L_3^2\pi^2/2 + 2((1-\lambda)L_1^2 + \epsilon_D)^2 + 2\epsilon_{nc}^2)b\tau\eta_t^2) + \frac{\eta_t^2\tilde{C}^24b\tau}{T} \leq \eta_t L_2 \quad (68)$$

Thus let  $\eta_t = \sqrt{\frac{2(F(w_1) - F(w^*))}{bTV^2L_2}}$ ,

$$\frac{1}{T} \sum_{t=1}^T \mathbb{E} \|\nabla F(w_t)\|^2 \leq V \sqrt{\frac{2D_0L_2}{bT}}. \quad (69)$$

And we can get the condition for  $T$  by putting  $\eta$  in ineq.63 and ineq.68, we can get that

$$\tau \leq \min \left\{ \frac{L_2V}{C_\lambda} \sqrt{\frac{L_2T}{2D_0b}}, \frac{V}{C_\lambda} \sqrt{\frac{L_2T}{2D_0b}}, \frac{TV}{\tilde{C}} \sqrt{\frac{L_2}{bD_0}}, \frac{VL_2T}{4\tilde{C}} \sqrt{\frac{TL_2}{2D_0b}} \right\}. \quad (70)$$

## F. Decreasing rate of the approximation error $\epsilon_t$

Since  $\epsilon_t$  is contained the proof of the convergence rate for DC-ASGD, in this section we will introduce a lemma which describes the approximation error  $\epsilon_t$  the for both convex and nonconvex cases.

**Lemma F.1** *Assume that the true label  $y$  is generated according to the distribution  $\mathbb{P}(Y = k|x, w^*) = \sigma_k(x, w^*)$  and  $f(x, y, \mathbf{w}) = -\sum_{k=1}^K (I_{[y=k]} \log \sigma_k(x; \mathbf{w}))$ . If we assume that the loss function is  $\mu$ -strongly convex about  $w$ . We denote  $\mathbf{w}_t$  is the output of DC-ASGD by using the outerproduct approximation of Hessian, we have*

$$\epsilon_t = \left| \mathbb{E}_{(x, y|w^*)} \frac{\partial^2}{\partial \mathbf{w}^2} f(x, y, \mathbf{w}_t) - \mathbb{E}_{(x, y|w^*)} \left( \frac{\partial}{\partial \mathbf{w}} f(x, y, \mathbf{w}_t) \right) \otimes \left( \frac{\partial}{\partial \mathbf{w}} f(x, y, \mathbf{w}_t) \right) \right| \leq \theta \sqrt{\frac{1}{t}},$$

where  $\theta = \frac{2HKLVL_2}{\mu^2} \sqrt{\frac{1}{\mu} \left( 1 + \frac{L_2 + \lambda L_1^2}{L_2} \tau \right)}$ .

If we assume that the loss function is  $\mu$ -strongly convex in a neighborhood of each local optimal  $d(\mathbf{w}_{loc}, r)$ ,  $\left| \frac{\partial^2 \mathbb{P}(Y=k|x, \mathbf{w})}{\partial^2 \mathbf{w}} \times \frac{1}{P(Y=k|x, \mathbf{w})} \right| \leq H, \forall k, x, w$ , each  $\sigma_k(\mathbf{w})$  is  $L$ -Lipschitz continuous about  $\mathbf{w}$ . We denote  $\mathbf{w}_t$  is the output of DC-ASGD by using the outerproduct approximation of Hessian, we have

$$\epsilon_t = \left| \mathbb{E}_{(x, y|w^*)} \frac{\partial^2}{\partial \mathbf{w}^2} f(x, y, \mathbf{w}_t) - \mathbb{E}_{(x, y|w^*)} \left( \frac{\partial}{\partial \mathbf{w}} f(x, y, \mathbf{w}_t) \right) \otimes \left( \frac{\partial}{\partial \mathbf{w}} f(x, y, \mathbf{w}_t) \right) \right| \leq \theta \sqrt{\frac{1}{t - T_0}} + \epsilon_{nc}.$$

where  $t > T_0 \geq \mathcal{O}(\frac{1}{r^8})$ .

**Proof:**

$$\begin{aligned} \mathbb{E}_{(y|x, w^*)} \frac{\partial^2}{\partial \mathbf{w}^2} f(x, Y, \mathbf{w}_t) &= -\mathbb{E}_{(y|x, w^*)} \frac{\partial^2}{\partial \mathbf{w}^2} \left( \sum_{k=1}^K (I_{[y=k]} \log \sigma_k(x; \mathbf{w}_t)) \right) \\ &= -\mathbb{E}_{(y|x, w^*)} \frac{\partial^2}{\partial \mathbf{w}^2} \log \left( \prod_{k=1}^K \sigma_k(x, \mathbf{w}_t)^{I_{[y=k]}} \right) \\ &= -\mathbb{E}_{(y|x, w^*)} \frac{\partial^2}{\partial \mathbf{w}^2} \log \mathbb{P}(y|x, \mathbf{w}_t) \\ &= -\mathbb{E}_{(y|x, w^*)} \frac{\frac{\partial^2}{\partial \omega^2} \mathbb{P}(y|x, \mathbf{w}_t)}{\mathbb{P}(y|x, \mathbf{w}_t)} + \mathbb{E}_{(y|x, w^*)} \left( \frac{\frac{\partial}{\partial \omega} \mathbb{P}(y|x, \mathbf{w}_t)}{\mathbb{P}(y|x, \mathbf{w}_t)} \right)^2 \\ &= -\mathbb{E}_{(y|x, w^*)} \frac{\frac{\partial^2}{\partial \omega^2} \mathbb{P}(y|x, \mathbf{w}_t)}{\mathbb{P}(y|x, \mathbf{w}_t)} + \mathbb{E}_{(y|x, w^*)} \left( \frac{\partial}{\partial \omega} \log \mathbb{P}(y|x, \mathbf{w}_t) \right)^2 \\ &= -\mathbb{E}_{(y|x, w^*)} \frac{\frac{\partial^2}{\partial \omega^2} \mathbb{P}(y|x, \mathbf{w}_t)}{\mathbb{P}(y|x, \mathbf{w}_t)} + \mathbb{E}_{(y|x, w^*)} \left( \frac{\partial}{\partial \omega} f(x, Y, \mathbf{w}_t) \right)^2. \end{aligned} \quad (71)$$

Since  $\mathbb{E}_{(y|x, \mathbf{w}_t)} \frac{\partial^2 \mathbb{P}(y|x, \mathbf{w}_t)}{\partial \omega^2 \mathbb{P}(y|x, \mathbf{w}_t)} = 0$  by the two equivalent methods to calculating fisher information matrix (Friedman et al., 2001), we have

$$\begin{aligned} \left| \mathbb{E}_{(y|x, \mathbf{w}^*)} \frac{\partial^2 \mathbb{P}(y|x, \mathbf{w}_t)}{\partial \omega^2 \mathbb{P}(y|x, \mathbf{w}_t)} \right| &= \left| \mathbb{E}_{(y|x, \mathbf{w}^*)} \frac{\partial^2 \mathbb{P}(y|x, \mathbf{w}_t)}{\partial \omega^2 \mathbb{P}(y|x, \mathbf{w}_t)} - \mathbb{E}_{(y|x, \mathbf{w}_t)} \frac{\partial^2 \mathbb{P}(y|x, \mathbf{w}_t)}{\partial \omega^2 \mathbb{P}(y|x, \mathbf{w}_t)} \right| \\ &= \left| \sum_{k=1}^K \frac{\partial^2}{\partial \omega^2} \mathbb{P}(Y = k|X = x, \mathbf{w}_t) \times \frac{\mathbb{P}(Y = k|x, \mathbf{w}^*) - \mathbb{P}(Y = k|x, \mathbf{w}_t)}{\mathbb{P}(Y = k|x, \mathbf{w}_t)} \right| \end{aligned} \quad (72)$$

$$\begin{aligned} &\leq H \cdot \sum_{k=1}^K |\mathbb{P}(Y = k|x, \mathbf{w}^*) - \mathbb{P}(Y = k|x, \mathbf{w}_t)| \\ &\leq H K L \|\mathbf{w}_t - \mathbf{w}_{loc}\| + H K \max_{k=1, \dots, K} |\mathbb{P}(Y = k|x, \mathbf{w}_{loc}) - \mathbb{P}(Y = k|x, \mathbf{w}^*)| \end{aligned} \quad (73)$$

$$\leq H K L \|\mathbf{w}_t - \mathbf{w}_{loc}\| + \epsilon_{nc}. \quad (74)$$

For strongly convex objective functions,  $\epsilon_{nc} = 0$  and  $w_{loc} = w^*$ . The only thing we need is to prove the convergence of DC-ASGD without using the information of  $\epsilon_t$  like before. By the smoothness condition, we have

$$\mathbb{E}F(w_{t+\tau+1}) - F(w^*) \quad (75)$$

$$\leq F(w_{t+\tau}) - F(w^*) - \eta_{t+\tau} \langle \nabla F(w_{t+\tau}), \mathbb{E}g^{dc}(w_t) \rangle + \frac{L_2 \eta_{t+\tau}^2 V^2}{2} \quad (76)$$

$$= F(w_{t+\tau}) - F(w^*) - \eta_{t+\tau} \langle \nabla F(w_{t+\tau}), \nabla F(w_{t+\tau}) \rangle \quad (77)$$

$$+ \eta_{t+\tau} \langle \nabla F(w_{t+\tau}), \nabla F(w_{t+\tau}) - \mathbb{E}g^{dc}(w_t) \rangle + \frac{L_2 \eta_{t+\tau}^2 V^2}{2} \quad (78)$$

$$\leq \left(1 - \frac{2\eta_{t+\tau}\mu^2}{L_2}\right) (F(w_{t+\tau}) - F(w^*)) + \eta_{t+\tau} \|\nabla F(w_{t+\tau})\| \|\nabla F(w_{t+\tau}) - \mathbb{E}g^{dc}(w_t)\| + \frac{L_2 \eta_{t+\tau}^2 V^2}{2} \quad (79)$$

$$\leq \left(1 - \frac{2\eta_{t+\tau}\mu^2}{L_2}\right) (F(w_{t+\tau}) - F(w^*)) + \eta_{t+\tau} V \cdot (L_2 + \lambda L_1^2) \|w_{t+\tau} - w_t\| + \frac{L_2 \eta_{t+\tau}^2 V^2}{2} \quad (80)$$

$$\leq \left(1 - \frac{2\eta_{t+\tau}\mu^2}{L_2}\right) (F(w_{t+\tau}) - F(w^*)) + \eta_{t+\tau} V \cdot (L_2 + \lambda L_1^2) \left\| \sum_{j=1}^{\tau} \eta_{t+\tau-j} g^{dc}(w_t) \right\| + \frac{L_2 \eta_{t+\tau}^2 V^2}{2} \quad (81)$$

Taking expectation to the above inequality, we can get

$$\mathbb{E}F(w_{t+\tau+1}) - F(w^*) \leq \left(1 - \frac{2\eta_{t+\tau}\mu^2}{L_2}\right) (\mathbb{E}F(w_{t+\tau}) - F(w^*)) + \frac{\eta_{t+\tau}^2 (L_2 + \lambda L_1^2) V^2 \tau}{2} + \frac{L_2 \eta_{t+\tau}^2 V^2}{2} \quad (82)$$

$$\leq \left(1 - \frac{2\eta_{t+\tau}\mu^2}{L_2}\right) (\mathbb{E}F(w_{t+\tau}) - F(w^*)) + \frac{\eta_{t+\tau}^2 V^2 L_2}{2} \left(1 + \frac{L_2 + \lambda L_1^2}{L_2} \tau\right). \quad (83)$$

Let  $\eta_t = \frac{L_2}{\mu^2 t}$ , we have

$$\mathbb{E}F(w_{t+1}) - F(w^*) \leq \left(1 - \frac{2}{t}\right) (\mathbb{E}F(w_t) - F(w^*)) + \frac{V^2 L_2^2}{2\mu^4 t^2} \left(1 + \frac{L_2 + \lambda L_1^2}{L_2} \tau\right). \quad (84)$$

We can get

$$\mathbb{E}F(w_t) - F(w^*) \leq \frac{2L_2^2 V^2}{t\mu^4} \left(1 + \frac{L_2 + \lambda L_1^2}{L_2} \tau\right). \quad (85)$$

by induction. Then we can get

$$\|w_t - w^*\|^2 \leq \frac{4L_2^2 V^2}{t\mu^5} \left(1 + \frac{L_2 + \lambda L_1^2}{L_2} \tau\right). \quad (86)$$

By putting Ineq.86 into Ineq.73, we can get the result in the theorem.

For nonconvex case, if  $\mathbf{w}_t \in \mathcal{B}(\mathbf{w}_{loc}, r)$ , we have  $\mathbb{E}(\mathbf{w}_t - \mathbf{w}_{loc}) \leq \frac{1}{\mu} \mathbb{E} \nabla F(\mathbf{w}_t)$  under the assumptions. Next we will prove that, for nonconvex loss function  $f(x, y, \mathbf{w}_t)$ , DC-ASGD has ergodic convergence rate.  $\min_{t=1, \dots, T} \mathbb{E} \left\| \frac{\partial}{\partial \mathbf{w}_t} F(x, y, \mathbf{w}_t) \right\|^2 = \mathcal{O}(1/\sqrt{T})$ , where the expectation is taking with respect to the stochastic sampling.



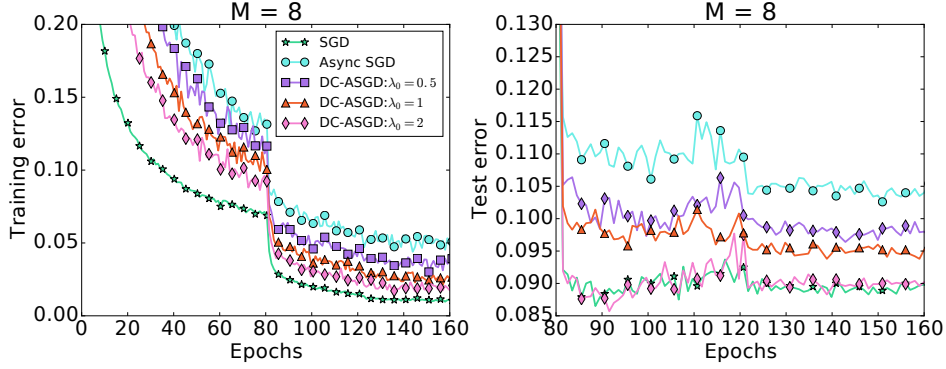

Figure 1. Error rates of the global model with Different  $\lambda_0$  w.r.t. number of effective passes on CIFAR-10

Compared with the proof of ASGD (Lian et al., 2015), DC-ASGD with Hessian approximation has

$$T_1 = \|\nabla F(w_{t+\tau}) - \mathbb{E}g^{dc}(w_t)\|^2 \quad (87)$$

$$= \|\nabla F(w_{t+\tau}) - \nabla F(w_t) - \lambda \mathbb{E}g(w_t) \odot g(w_t) \cdot (w_{t+\tau} - w_t)\|^2 \quad (88)$$

$$\leq 2\|\nabla F(w_{t+\tau}) - \nabla F(w_t)\|^2 + 2\|\lambda \mathbb{E}g(w_t) \odot g(w_t) \cdot (w_{t+\tau} - w_t)\|^2 \quad (89)$$

$$\leq 2(L_2^2 + \lambda^2 L_1^4)\|w_{t+\tau} - w_t\|^2, \quad (90)$$

since  $L_1$  is the upper bound of  $\nabla f(w)$  and  $L_2$  is the smooth coefficient of  $f(w)$ . Suppose that  $\eta = \sqrt{\frac{2D_0}{bTV^2L_2}}$  and  $\tau$  is upper bounded as Theorem 5.1,

$$\min_{t=1, \dots, T} \mathbb{E}\|\nabla F(w_t)\|^2 \leq \frac{1}{T} \sum_{t=1}^T \mathbb{E}\|\nabla F(w_t)\|^2 \leq \mathcal{O}\left(\frac{1}{T^{1/2}}\right). \quad (91)$$

Referring to a recent work of Lee *et al.* (Lee et al., 2016), GD with a random initialization and sufficiently small constant step size converges to a local minimizer almost surely under the assumptions in Theorem 1.2. Thus, the assumption that  $F(w)$  is  $\mu$ -strongly convex in the  $r$ -neighborhood of arbitrary local minimum  $w_{loc}$  is easily to be satisfied with probability one. By the  $L_1$ -Lipschitz assumption, we have  $P(Y = k|x, w_t) - P(Y = k|x, w_{loc}) \leq L_1\|w_t - w_{loc}\|$ . By the  $L_2$ -smooth assumption, we have  $L_2\|w_t - w_{loc}\|^2 \geq \langle \nabla F(w_t), w_t - w_{loc} \rangle$ . Thus for  $w_t \in \mathcal{B}(w_{loc}, r)$ , we have  $\|\nabla F(w_t)\| \leq L_2\|w_t - w_{loc}\| \leq L_2r$ . By the continuously twice differential assumption, we can assume that  $\|\nabla F(w_t)\| \leq L_2\|w_t - w_{loc}\| \leq L_2r$  for  $w_t \in \mathcal{B}(w_{loc}, r)$  and  $\|\nabla F(w_t)\| \leq L_2\|w_t - w_{loc}\| > L_2r$  for  $w_t \notin \mathcal{B}(w_{loc}, r)$  without loss of generality<sup>2</sup>. Therefore  $\min_{t=1, \dots, T} \mathbb{E}\|\nabla F(w_t)\|^2 \leq L_2^2r^2$  is a sufficient condition for  $\mathbb{E}\|w_T - w_{loc}\| \leq r$ .

$$\min_{t=1, \dots, T_0} \mathbb{E}\|\nabla F(w_t)\|^2 \leq \mathcal{O}\left(\frac{1}{T_0^{1/2}}\right) \leq r^2. \quad (92)$$

We have  $T_0 \geq \mathcal{O}\left(\frac{1}{r^4}\right)$ .

Thus we have finished the proof for nonconvex case.

## G. Experimental Results on the Influence of $\lambda$

In this section, we show how the parameter  $\lambda$  affect our DC-ASGD algorithm. We compare the performance of respectively sequential SGD, ASGD and DC-ASGD-a with different value of initial  $\lambda_0$ <sup>3</sup>. The results are given in Figure 1. This experiment reflects to the discussion in Section 5, too large value of this parameter ( $\lambda_0 > 2$  in this setting) will introduce large variance and lead to a wrong gradient direction, meanwhile too small will make the compensation influence nearly disappear. As  $\lambda$  decreasing, DC-ASGD will gradually degrade to ASGD. A proper  $\lambda$  will lead to significant better accuracy.

<sup>2</sup>We can choose  $r$  small enough to make it satisfied.

<sup>3</sup>We also compare different  $\lambda_0$  for DC-ASGD-c and the results are very similar to DC-ASGD-a.

## H. Large Mini-batch Synchronous SGD with Delay-Compensated Gradient

In this section, we discuss how delay-compensated gradient can be used in synchronous SGD. The effective mini-batch size in SSGD is usually enlarged  $M$  times comparing with sequential SGD. A learning rate scaling trick is commonly used to overcome the influence of large mini-batch size in SSGD (Goyal et al., 2017): when the mini-batch size is multiplied by  $M$ , multiply the learning rate by  $M$ . For sequential mini-batch SGD with learning rate  $\eta$  we have:

$$\mathbf{w}_{t+M} = \mathbf{w}_t - \eta \sum_{j=0}^{M-1} g(\mathbf{w}_{t+j}, z_{t+j}), \quad (93)$$

where  $z_{t+j}$  is the  $t+j$ -th minibatch.

On the other hand, taking one step with  $M$  times large mini-batch size and learning rate  $\hat{\eta} = M\eta$  in synchronous SGD yields:

$$\hat{\mathbf{w}}_{t+1} = \mathbf{w}_t - \hat{\eta} \frac{1}{M} \sum_{j=0}^{M-1} g(\mathbf{w}_t, z_t^j), \quad (94)$$

where  $z_t^j$  is the  $t$ -th minibatch on local machine  $j$ .

Assume that  $z_{t+j} = z_t^j$ . The assumption  $g(\mathbf{w}_{t+j}, z_{t+j}) \approx g(\mathbf{w}_t, z_t^j)$  was made in synchronous SGD (Goyal et al., 2017). However, it often may not hold.

If we denote  $\tilde{\mathbf{w}}_{t+1}^j = \mathbf{w}_t - \hat{\eta} \frac{1}{M} \sum_{i<j} g(\mathbf{w}_t, z_t^i)$ , we can unfold the summation in Eq.94 to

$$\tilde{\mathbf{w}}_{t+1}^{j+1} = \tilde{\mathbf{w}}_{t+1}^j - \hat{\eta} \frac{1}{M} g(\mathbf{w}_t, z_t^j), j < M, \quad (95)$$

then we have  $\hat{\mathbf{w}}_{t+1} = \tilde{\mathbf{w}}_{t+1}^M$ . We propose to use Eq.(5) in the main paper to compensate this assumption and apply delay-compensated gradient to update Eq.95 with:

$$g(\mathbf{w}_{t+j}, z_{t+j}) \approx \tilde{g}(\tilde{\mathbf{w}}_{t+1}^j, z_t^j) := g(\mathbf{w}_t, z_t^j) + \lambda g(\mathbf{w}_t, z_t^j) \odot g(\mathbf{w}_t, z_t^j) \odot (\tilde{\mathbf{w}}_{t+1}^j - \mathbf{w}_t), \quad (96)$$

$$\tilde{\mathbf{w}}_{t+1}^{j+1} = \tilde{\mathbf{w}}_{t+1}^j - \hat{\eta} \frac{1}{M} \tilde{g}(\tilde{\mathbf{w}}_{t+1}^j, z_t^j), j < M. \quad (97)$$

Please note that we redefine the previous  $\tilde{\mathbf{w}}_{t+1}^{j+1}$  in Eq.97. For  $j > 1$ , we need to design an order to make  $\tilde{\mathbf{w}}_{t+1}^j \approx \mathbf{w}_{t+j}$ . Choosing  $\tilde{\mathbf{w}}_{t+1}^j$  according to the increasing order of  $\|\tilde{\mathbf{w}}_{t+1}^j - \mathbf{w}_t\|^2$  can be used since the smaller distance with  $\mathbf{w}_t$  will induce more accurate approximation by using Taylor expansion.

## References

- Friedman, Jerome, Hastie, Trevor, and Tibshirani, Robert. *The elements of statistical learning*, volume 1. Springer series in statistics Springer, Berlin, 2001.
- Goyal, Priya, Dollar, Piotr, Girshick, Ross, Noordhuis, Pieter, Wesolowski, Lukasz, Kyrola, Aapo, Tulloch, Andrew, Jia, Yangqing, and He, Kaiming. Accurate, large minibatch sgd: Training imagenet in 1 hour. *arXiv preprint arXiv:1706.02677*, 2017.
- LeCun, Yann. *Modèles connexionnistes de l'apprentissage*. PhD thesis, These de Doctorat, Universite Paris 6, 1987.
- Lee, Jason D, Simchowitz, Max, Jordan, Michael I, and Recht, Benjamin. Gradient descent converges to minimizers. *University of California, Berkeley*, 1050:16, 2016.
- Lian, Xiangru, Huang, Yijun, Li, Yuncheng, and Liu, Ji. Asynchronous parallel stochastic gradient for nonconvex optimization. In *Advances in Neural Information Processing Systems*, pp. 2737–2745, 2015.
